# Supplementary material
Source: Frontiers journal article supplement (https://www.frontiersin.org/articles/517870)
Supplement: Image_2.pdf [file Image_2.pdf]

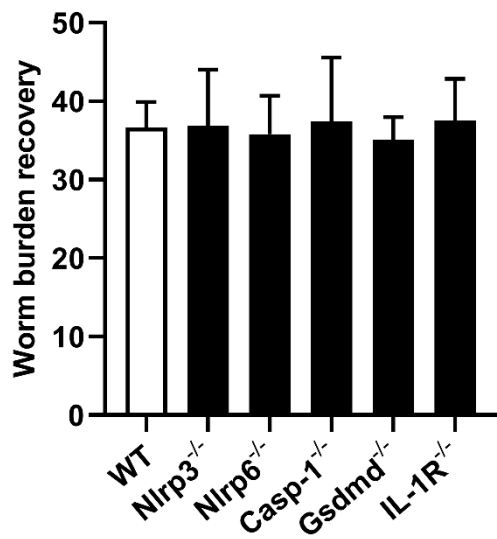

**Supplementary Figure 2. Worm burden recovery from NLRP3, NLRP6, caspase-1, Gasdermin-D and IL-1R knockout mice.** After six weeks of infection (100 cercariae), mice were euthanized and perfused from the portal veins. The recovered worms were counted and the mean difference between groups of mice was evaluated. Graphs represent data from two independent trials.
